# Supplementary material for: Impact of Sustained Fructose Consumption on Gastrointestinal Function and Health in Wistar Rats: Glycoxidative Stress, Impaired Protein Digestion, and Shifted Fecal Microbiota
Source: PubMed Central journal article supplement (PMC10623553; doi:10.1021/acs.jafc.3c04515), 2023-10-20
Supplement: jf3c04515_si_001.pdf [file jf3c04515_si_001.pdf]

## Supporting Information

### Impact of Sustained Fructose Consumption on Gastrointestinal Function and Health in *Wistar* rats: Glycooxidative Stress, Impaired Protein Digestion and Shifted Faecal Microbiota

Guadalupe Sánchez-Terrón<sup>1</sup>, Remigio Martínez<sup>1,2,3</sup>, Jorge Ruiz<sup>1</sup>, Carolina Luna<sup>4</sup>, & Mario Estévez<sup>1\*</sup>

<sup>1</sup>TECAL Research Group, Meat and meat products research institute (IPROCAR), Universidad de Extremadura (UEX, ROR-ID 0174shg90), Cáceres, 10003, Spain

<sup>2</sup>Animal Health Department. Universidad of Extremadura (UEX, ROR-ID 0174shg90), Cáceres, 10003, Spain.

<sup>3</sup>Animal Health Department, GISAZ Research Group, ENZOEM Competitive Research Unit, Universidad of Córdoba (UCO, ROR-ID 05yc77b46), Córdoba, 14014, Spain.

<sup>4</sup>Emergency unit, Servicio Extremeño de Salud, SES, Junta de Extremadura (ROR-ID 0174shg90), Cáceres, 10003, Spain

\*Corresponding author: Mario Estévez, Email: [mariovet@unex.es](mailto:mariovet@unex.es)

**TABLE S1.** Energy (kJ/day) provided by the feed and the supplemented water expressed as median [interquartile range] in the experimental consumer groups.

|                             | Feed energy <sup>a</sup> | Fructose-drinking water energy <sup>a</sup> | Total energy <sup>a</sup> |
|-----------------------------|--------------------------|---------------------------------------------|---------------------------|
| Fructose                    | 87.41 [141.71-56.80]     | 39.41 [57.77-28.51]                         | 131.90 [188.48-95.51]     |
| Control                     | 99.41 [151.78-72.19]     | 0.00 [0.00-0.00]                            | 99.41 [151.78-72.19]      |
| <i>p</i> value <sup>b</sup> | ns                       | ***                                         | ns                        |

<sup>a</sup> Energy supplied by the feed or/and the fructose-drinking water expressed in kJ/day.

<sup>b</sup> Significance level in U-Mann Whitney test with the effect of fructose supplementation. \*:  $p < 0.05$ ; \*\*:  $p < 0.01$ ; \*\*\*:  $p < 0.001$ ; ns: no significant.

**TABLE S2.** Evolution of the weights of the fructose and control rats during the study.

| Week | Group    | Weight <sup>a</sup> | <i>p</i> value <sup>b</sup> |
|------|----------|---------------------|-----------------------------|
| 0    | Fructose | 177.97±22.18        | ns                          |
|      | Control  | 175.48±18.08        |                             |
| 1    | Fructose | 225.00±23.88        | ns                          |
|      | Control  | 229.25±19.98        |                             |
| 2    | Fructose | 269.69±26.88        | ns                          |
|      | Control  | 271.18±27.50        |                             |
| 3    | Fructose | 303.79±29.56        | ns                          |
|      | Control  | 296.00±31.24        |                             |
| 4    | Fructose | 332.61±31.50        | ns                          |
|      | Control  | 313.28±33.36        |                             |
| 5    | Fructose | 352.76±33.62        | ns                          |
|      | Control  | 332.23±32.09        |                             |
| 6    | Fructose | 373.16±36.44        | ns                          |
|      | Control  | 355.08±35.25        |                             |
| 7    | Fructose | 404.16±41.90        | ns                          |
|      | Control  | 379.85±32.67        |                             |
| 8    | Fructose | 412.10±45.01        | ns                          |
|      | Control  | 390.12±29.96        |                             |
| 9    | Fructose | 433.17±46.46        | ns                          |
|      | Control  | 404.52±29.88        |                             |
| 10   | Fructose | 441.56±45.38        | ns                          |
|      | Control  | 410.35±24.61        |                             |

<sup>a</sup> Means±SD of the animal weights during the experiment expressed as g.

<sup>b</sup> Significance level in Student-T test with the effect of the diet (fructose and control). \*:  $p < 0.05$ ; \*\*:  $p < 0.01$ ; \*\*\*:  $p < 0.001$ ; ns: no significant.

**TABLE S3.** List of species selected for the statistical analysis to highlighted differences among the relative abundance of *bacterium* from genera affected by the fructose treatment.

| Genera                             | Detected species                                                                                                                                                                                                               | Criteria                                                                                     | References |
|------------------------------------|--------------------------------------------------------------------------------------------------------------------------------------------------------------------------------------------------------------------------------|----------------------------------------------------------------------------------------------|------------|
| <i>Akkermansia</i>                 | Uncultured bacterium                                                                                                                                                                                                           | Fructose-affected proposed microorganism                                                     | 1          |
| <i>Lactobacillus</i>               | Unclassified bacterium<br><i>Lactobacillus grasseri</i><br><i>Lactobacillus reuteri</i><br><i>Lactobacillus intestinalis</i>                                                                                                   | Fructose-affected proposed microorganism<br>Oxidized protein-affected proposed microorganism | 1,2        |
| <i>Escherichia-Shigella</i>        | Unclassified bacterium                                                                                                                                                                                                         | Proteolytic bacteria                                                                         | 3          |
| <i>Bacteroides</i>                 | Unclassified bacterium<br><i>Bacteroides acidifaciens</i><br><i>Bacteroides vulgatus</i><br><i>Bacteroides uniformis</i><br><i>Bacteroides eggerthii</i><br><i>Bacteroides massiliensis</i><br><i>Bacteroides intestinalis</i> | Fructose-affected proposed microorganism<br>Proteolytic bacteria                             | 1,3        |
| <i>Ruminococcus</i>                | Unidentified bacterium<br>Unclassified bacterium<br><i>Ruminococcus flavefaciens</i><br><i>Ruminococcus callidus</i>                                                                                                           | Fructose-affected proposed microorganism                                                     | 4          |
| <i>Alistipes</i>                   | Uncultured bacterium<br>Unclassified <i>Alistipes</i><br><i>Alistipes finegoldii</i><br><i>Alistipes shashii</i>                                                                                                               | Proteolytic bacteria                                                                         | 3          |
| <i>Parasuterella</i>               | Unclassified bacterium                                                                                                                                                                                                         | Fructose-affected proposed microorganism                                                     | 4          |
| <i>Romboutsia</i>                  | Unclassified bacterium                                                                                                                                                                                                         |                                                                                              |            |
| <i>Muribaculum</i>                 | Unclassified bacterium<br>Uncultured bacterium                                                                                                                                                                                 | Fructose-affected proposed microorganism                                                     | 1          |
| <i>Clostridium sensu stricto 1</i> | Unclassified bacterium                                                                                                                                                                                                         | Proteolytic bacteria<br>Oxidized protein-affected proposed microorganism                     | 2,3        |
| <i>Erysipelatoclostridium</i>      | Unclassified bacterium                                                                                                                                                                                                         | Fructose-affected proposed microorganism<br>Proteolytic bacteria                             | 3,4        |
| <i>Barnesiella</i>                 | Unclassified bacterium                                                                                                                                                                                                         | Fructose-affected proposed microorganism                                                     | 4          |
| <i>Parabacteroides</i>             | <i>Parabacteroides sp.</i><br><i>Parabacteroides merdae</i><br><i>Parabacteroides distasonis</i>                                                                                                                               | Fructose-affected proposed microorganism<br>Proteolytic bacteria                             | 3,4        |
| <i>Blautia</i>                     | Lachnospiraceae bacterium<br>Unclassified bacterium                                                                                                                                                                            |                                                                                              |            |
| <i>Roseburia</i>                   | Uncultured bacterium<br>Unclassified bacterium                                                                                                                                                                                 |                                                                                              |            |
| <i>Marvinbryantia</i>              | Uncultured bacterium<br>Unclassified bacterium                                                                                                                                                                                 | Fructose-induced microbiota shift                                                            | 1          |
| <i>Lachnoclostridium</i>           | Unclassified bacterium                                                                                                                                                                                                         | Proteolytic bacteria                                                                         | 3          |
| <i>Streptococcus</i>               | <i>Streptococcus sp.</i>                                                                                                                                                                                                       |                                                                                              |            |
| <i>Bifidobacterium</i>             | <i>Bifidobacterium animalis</i>                                                                                                                                                                                                | AGEs <sup>1</sup> -affected proposed microorganism                                           | 5          |

<sup>1</sup>AGEs: Advanced glycation end-products.

TABLE S4. Metabolites characterization.

| Name                           | Formula                                                     | Structure                                                                           | Cal. MW | m/z     | MS2                   | Reference ion        | SMILES                                                                                              | InChi                                                                                                                                                                                        |
|--------------------------------|-------------------------------------------------------------|-------------------------------------------------------------------------------------|---------|---------|-----------------------|----------------------|-----------------------------------------------------------------------------------------------------|----------------------------------------------------------------------------------------------------------------------------------------------------------------------------------------------|
| Phenylalanine                  | C <sub>9</sub> H <sub>11</sub> N O <sub>2</sub>             | 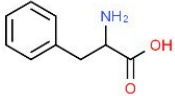   | 165.078 | 166.086 | DDA for preferred ion | [M+H] <sup>+</sup> 1 | <chem>c1ccc(cc1)CC(C(=O)O)N</chem>                                                                  | InChI=1S/C9H11NO2/c10-8(9(11)12)6-7-4-2-1-3-5-7/h1-5,8H,6,10H2,(H,11,12)                                                                                                                     |
| alpha-Cyclopentylmandelic acid | C <sub>13</sub> H <sub>16</sub> O <sub>3</sub>              |    | 220.109 | 221.116 | No MS2                | [M+H] <sup>+</sup> 1 | <chem>c1ccc(cc1)C(C2CCCC2)(C(=O)O)O</chem>                                                          | InChI=1S/C13H16O3/c14-12(15)13(16,11-8-4-5-9-11)10-6-2-1-3-7-10/h1-3,6-7,11,16H,4-5,8-9H2,(H,14,15)                                                                                          |
| Histamine                      | C <sub>5</sub> H <sub>9</sub> N <sub>3</sub>                |    | 111.079 | 112.086 | No MS2                | [M+H] <sup>+</sup> 1 | <chem>c1c(nc[nH]1)CCN</chem>                                                                        | InChI=1S/C5H9N3/c6-2-1-5-3-7-4-8-5/h3-4H,1-2,6H2,(H,7,8)                                                                                                                                     |
| Inspra                         | C <sub>24</sub> H <sub>30</sub> O <sub>6</sub>              |   | 414.203 | 415.211 | No MS2                | [M+H] <sup>+</sup> 1 | <chem>C[C@]12CCC(=O)C=C1C[C@H]([C@@H]3[C@]24[C@H](O4)C[C@]5([C@H]3CC[C@@]56CCC(=O)O6)C(=O)OC</chem> | InChI=1S/C24H30O6/c1-21-7-4-14(25)10-13(21)11-15(20(27)28-3)19-16-5-8-23(9-6-18(26)30-23)22(16,2)12-17-24(19,21)29-17/h10,15-17,19H,4-9,11-12H2,1-3H3/t15-,16+,17-,19+,21+,22+,23-,24-/m1/s1 |
| Creatine                       | C <sub>4</sub> H <sub>9</sub> N <sub>3</sub> O <sub>2</sub> |  | 131.069 | 132.076 | DDA for preferred ion | [M+H] <sup>+</sup> 1 | <chem>CN(CC(=O)O)C(=N)N</chem>                                                                      | InChI=1S/C4H9N3O2/c1-7(4(5)6)2-                                                                                                                                                              |

|                                                             |               |                                                                                     |         |         |                       |         |                                     |                                                                                                                |                                |
|-------------------------------------------------------------|---------------|-------------------------------------------------------------------------------------|---------|---------|-----------------------|---------|-------------------------------------|----------------------------------------------------------------------------------------------------------------|--------------------------------|
|                                                             |               |                                                                                     |         |         |                       |         |                                     |                                                                                                                | 3(8)9/h2H2,1H3,(H3,5,6)(H,8,9) |
| Phosphoric acid                                             | H3 O4 P       | 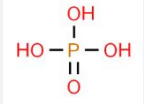   | 97.976  | 96.969  | DDA for preferred ion | [M-H]-1 | OP(=O)(O)O                          | InChI=1S/H3O4P/c1-5(2,3)4/h(H3,1,2,3,4)                                                                        |                                |
| (9Z)-9-Octadecenamide                                       | C18 H35 N O   |    | 281.271 | 282.278 | No MS2                | [M+H]+1 | CCCCCCCC/C=C\CCCCCCC(=N)O           | InChI=1S/C18H35NO/c1-2-3-4-5-6-7-8-9-10-11-12-13-14-15-16-17-18(19)20/h9-10H,2-8,11-17H2,1H3,(H2,19,20)/b10-9- |                                |
| 2-(Trimethylammonio)ethanolate                              | C5 H13 N O    |    | 103.099 | 104.106 | DDA for preferred ion | [M+H]+1 | C[N+](C)(C)CC[O-]                   | InChI=1S/C5H13NO/c1-6(2,3)4-5-7/h4-5H2,1-3H3                                                                   |                                |
| beta-Alanine                                                | C3 H7 N O2    |    | 89.047  | 88.040  | DDA for preferred ion | [M-H]-1 | C(CN)C(=O)O                         | InChI=1S/C3H7NO2/c4-2-1-3(5)6/h1-2,4H2,(H,5,6)                                                                 |                                |
| (1,1-Dioxido-1,2-thiazinan-3-yl)methanol                    | C5 H11 N O3 S |   | 165.045 | 166.053 | DDA for preferred ion | [M+H]+1 | C1CC(NS(=O)(=O)C1)CO                | InChI=1S/C5H11NO3S/c7-4-5-2-1-3-10(8,9)6-5/h5-7H,1-4H2                                                         |                                |
| (1R,2R,3R,4S,5R)-4-Amino-5-sulfanyl-1,2,3-cyclopentanetriol | C5 H11 N O3 S |  | 165.045 | 166.053 | DDA for preferred ion | [M+H]+1 | [C@@H]1([C@H]([C@H]([C@H]1S)O)O)O)N | InChI=1S/C5H11NO3S/c6-1-2(7)3(8)4(9)5(1)10/h1-5,7-10H,6H2/t1-,2+,3+,4+,5+/m0/s1                                |                                |

|                              |             |                                                                                     |         |         |                       |                      |                                     |                                                                                                            |
|------------------------------|-------------|-------------------------------------------------------------------------------------|---------|---------|-----------------------|----------------------|-------------------------------------|------------------------------------------------------------------------------------------------------------|
| 2-Methylamino-butyrinic acid | C5 H11 N O2 | 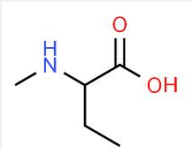   | 117.078 | 118.086 | DDA for preferred ion | [M+H] <sup>+</sup> 1 | O=C(O)C(NC)C<br>C                   | InChI=1S/C5H11NO2/c1-3-4(6-2)5(7)8/h4,6H,3H2,1-2H3,(H,7,8)                                                 |
| Glutamic acid                | C5 H9 N O4  |    | 147.053 | 148.060 | DDA for preferred ion | [M+H] <sup>+</sup> 1 | C(CC(=O)O)C(C(=O)O)N                | InChI=1S/C5H9NO4/c6-3(5(9)10)1-2-4(7)8/h3H,1-2,6H2,(H,7,8)(H,9,10)                                         |
| Proline                      | C5 H9 N O2  |    | 115.063 | 116.070 | DDA for preferred ion | [M+H] <sup>+</sup> 1 | C1CC(NC1)C(=O)O                     | InChI=1S/C5H9NO2/c7-5(8)4-2-1-3-6-4/h4,6H,1-3H2,(H,7,8)                                                    |
| Cyclandelate                 | C17 H24 O3  |    | 276.172 | 277.179 | No MS2                | [M+H] <sup>+</sup> 1 | CC1CC(CC(C1)(C)C)OC(=O)C(c2ccccc2)O | InChI=1S/C17H24O3/c1-12-9-14(11-17(2,3)10-12)20-16(19)15(18)13-7-5-4-6-8-13/h4-8,12,14-15,18H,9-11H2,1-3H3 |
| Sulfuric acid                | H2 O4 S     |  | 97.967  | 96.960  | DDA for preferred ion | [M-H] <sup>-</sup> 1 | OS(=O)(=O)O                         | InChI=1S/H2O4S/c1-5(2,3)4/h(H2,1,2,3,4)                                                                    |
| Linoelaidic Acid             | C18 H32 O2  |  | 280.239 | 281.246 | No MS2                | [M+H] <sup>+</sup> 1 | CCCCC/C=C/C/C=C/CCCCC<br>CC(=O)O    | InChI=1S/C18H32O2/c1-2-3-4-5-6-7-8-9-10-11-12-13-14-15-16-17-18(19)20/h6-7,9-10H,2-                        |

|                           |              |                                                                                     |         |         |                       |                      |                                |                                                                                                                           |  |                                       |
|---------------------------|--------------|-------------------------------------------------------------------------------------|---------|---------|-----------------------|----------------------|--------------------------------|---------------------------------------------------------------------------------------------------------------------------|--|---------------------------------------|
|                           |              |                                                                                     |         |         |                       |                      |                                |                                                                                                                           |  | 5,8,11-17H2,1H3,(H,19,20)/b7-6+,10-9+ |
| Nonivamide                | C17 H27 N O3 | 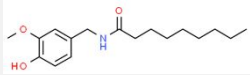   | 293.198 | 294.205 | DDA for preferred ion | [M+H] <sup>+</sup> 1 | CCCCCCCCC(=O)NCc1ccc(c(c1)OC)O | InChI=1S/C17H27NO3/c1-3-4-5-6-7-8-9-17(20)18-13-14-10-11-15(19)16(12-14)21-2/h10-12,19H,3-9,13H2,1-2H3,(H,18,20)          |  |                                       |
| L-Palmitin                | C19 H38 O4   |    | 330.276 | 331.283 | No MS2                | [M+H] <sup>+</sup> 1 | CCCCCCCCC(=O)OCC(O)O           | InChI=1S/C19H38O4/c1-2-3-4-5-6-7-8-9-10-11-12-13-14-15-19(22)23-17-18(21)16-20/h18,20-21H,2-17H2,1H3                      |  |                                       |
| Linoleamide               | C18 H33 N O  |    | 279.255 | 280.262 | No MS2                | [M+H] <sup>+</sup> 1 | CCCCC/C=C\C/C=C\CCCCCC(=O)N    | InChI=1S/C18H33NO/c1-2-3-4-5-6-7-8-9-10-11-12-13-14-15-16-17-18(19)20/h6-7,9-10H,2-5,8,11-17H2,1H3,(H2,19,20)/b7-6-,10-9- |  |                                       |
| 1-Dodecyl-2-pyrrolidinone | C16 H31 N O  |   | 253.240 | 254.247 | No MS2                | [M+H] <sup>+</sup> 1 | CCCCCCCCC(=O)NCCCC1=O          | InChI=1S/C16H31NO/c1-2-3-4-5-6-7-8-9-10-11-14-17-15-12-13-16(17)18/h2-15H2,1H3                                            |  |                                       |
| Indane                    | C9 H10       |  | 118.078 | 119.085 | No MS2                | [M+H] <sup>+</sup> 1 | c1ccc2c(c1)CC2                 | InChI=1S/C9H10/c1-2-5-9-7-3-6-8(9)4-1/h1-2,4-5H,3,6-7H2                                                                   |  |                                       |



|                                               |                                                     |                                                                                     |         |         |                       |                    |                                          |                                                                                                               |
|-----------------------------------------------|-----------------------------------------------------|-------------------------------------------------------------------------------------|---------|---------|-----------------------|--------------------|------------------------------------------|---------------------------------------------------------------------------------------------------------------|
| 1-(6-Methoxy-2-naphthyl) ethanol              | C <sub>13</sub> H <sub>14</sub> O <sub>2</sub>      | 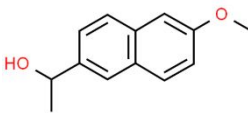   | 202.099 | 203.106 | No MS2                | [M+H] <sup>+</sup> | <chem>C[C@H](c1ccc2cc(ccc2c1)OC)O</chem> | InChI=1S/C13H14O2/c1-9(14)10-3-4-12-8-13(15-2)6-5-11(12)7-10/h3-9,14H,1-2H3/t9-/m1/s1                         |
| Oleic acid                                    | C <sub>18</sub> H <sub>34</sub> O <sub>2</sub>      |    | 282.255 | 283.262 | DDA for preferred ion | [M+H] <sup>+</sup> | <chem>CCCCCCCC/C=C\CCCCCCC(=O)O</chem>   | InChI=1S/C18H34O2/c1-2-3-4-5-6-7-8-9-10-11-12-13-14-15-16-17-18(19)20/h9-10H,2-8,11-17H2,1H3,(H,19,20)/b10-9- |
| 1-Octen-3-yne                                 | C <sub>8</sub> H <sub>12</sub>                      |    | 108.093 | 109.101 | DDA for preferred ion | [M+H] <sup>+</sup> | <chem>CCCCC#CC=C</chem>                  | InChI=1S/C8H12/c1-3-5-7-8-6-4-2/h3H,1,4,6,8H2,2H3                                                             |
| [1-Amino-1-(2-thienyl) ethyl] phosphinic acid | C <sub>6</sub> H <sub>10</sub> N O <sub>2</sub> P S |    | 191.016 | 192.024 | DDA for preferred ion | [M+H] <sup>+</sup> | <chem>CC(c1cccs1)(N)P(=O)O</chem>        | InChI=1S/C6H10NO2PS/c1-6(7,10(8)9)5-3-2-4-11-5/h2-4,10H,7H2,1H3,(H,8,9)                                       |
| 3-Oxostearic acid                             | C <sub>18</sub> H <sub>34</sub> O <sub>3</sub>      |  | 298.250 | 299.257 | DDA for preferred ion | [M+H] <sup>+</sup> | <chem>CCCCCCCCC(=O)CCCC(=O)O</chem>      | InChI=1S/C18H34O3/c1-2-3-4-5-6-7-8-9-10-11-12-13-14-15-17(19)16-18(20)21/h2-16H2,1H3,(H,20,21)                |

|                                                                   |                                                               |                                                                                     |         |         |                       |                      |                                                              |                                                                                                           |
|-------------------------------------------------------------------|---------------------------------------------------------------|-------------------------------------------------------------------------------------|---------|---------|-----------------------|----------------------|--------------------------------------------------------------|-----------------------------------------------------------------------------------------------------------|
| 4-Aminopyridine                                                   | C <sub>5</sub> H <sub>6</sub> N <sub>2</sub>                  | 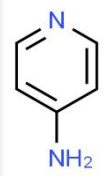   | 94.053  | 95.060  | No MS2                | [M+H] <sup>+</sup> 1 | c1c[nH]ccc1=N                                                | InChI=1S/C5H6N2/c6-5-1-3-7-4-2-5/h1-4H,(H2,6,7)                                                           |
| 1-Benzosuberone                                                   | C <sub>11</sub> H <sub>12</sub> O                             |    | 160.088 | 161.095 | No MS2                | [M+H] <sup>+</sup> 1 | c1ccc2c(c1)CC<br>CCC2=O                                      | InChI=1S/C11H12O/c12-11-8-4-2-6-9-5-1-3-7-10(9)11/h1,3,5,7H,2,4,6,8<br>H2                                 |
| 2,2'-(Dodecylimino) diethanol                                     | C <sub>16</sub> H <sub>35</sub> N O <sub>2</sub>              |    | 273.266 | 274.273 | No MS2                | [M+H] <sup>+</sup> 1 | CCCCCCCCC<br>CCN(CCO)CC<br>O                                 | InChI=1S/C16H35NO2/c1-2-3-4-5-6-7-8-9-10-11-12-17(13-15-18)14-16-19/h18-19H,2-16H2,1H3                    |
| beta-D-glucose 6-phosphate<br>(6-O-Phosphonobeta-D-glucopyranose) | C <sub>6</sub> H <sub>13</sub> O <sub>9</sub> P               |    | 260.029 | 259.022 | DDA for preferred ion | [M-H] <sup>-</sup> 1 | C([C@@H]1[C@@H]([C@H]([C@H]([C@H]([C@H]1O)O)O)O)O)OP(=O)(O)O | InChI=1S/C6H13O9P/c7-3-2(1-14-16(11,12)13)15-6(10)5(9)4(3)8/h2-10H,1H2,(H2,11,12,13)/t2-3-,4+,5-,6+/m1/s1 |
| 2-Aminobutanoic acid                                              | C <sub>4</sub> H <sub>9</sub> N O <sub>2</sub>                |   | 103.063 | 104.070 | DDA for preferred ion | [M+H] <sup>+</sup> 1 | CCC(C(=O)O)N                                                 | InChI=1S/C4H9NO2/c1-2-3(5)4(6)7/h3H,2,5H2,1H3,(H,6,7)                                                     |
| Cadaverine                                                        | C <sub>5</sub> H <sub>14</sub> N <sub>2</sub>                 |  | 102.115 | 103.122 | DDA for preferred ion | [M+H] <sup>+</sup> 1 | C(CCN)CCN                                                    | InChI=1S/C5H14N2/c6-4-2-1-3-5-7/h1-7H2                                                                    |
| Prolylleucylglycine                                               | C <sub>13</sub> H <sub>23</sub> N <sub>3</sub> O <sub>4</sub> |  | 285.168 | 286.175 | No MS2                | [M+H] <sup>+</sup> 1 | CC(C)C[C@@H](C(=O)NCC(                                       | InChI=1S/C13H23N3O4/c1-8(2)6-10(12(19)15-7-                                                               |

|                |              |                                                                                    |         |         |                       |                    |                                    |                                                                            |                                                                                                |
|----------------|--------------|------------------------------------------------------------------------------------|---------|---------|-----------------------|--------------------|------------------------------------|----------------------------------------------------------------------------|------------------------------------------------------------------------------------------------|
|                |              |                                                                                    |         |         |                       |                    |                                    | <chem>=O)O)NC(=O)[C@@H]1CCC(N)1</chem>                                     | 11(17)18)16-13(20)9-4-3-5-14-9/h8-10,14H,3-7H2,1-2H3,(H,15,19)(H,16,20)(H,17,18)/t9-,10-/m0/s1 |
| Serylglycine   | C5 H10 N2 O4 | 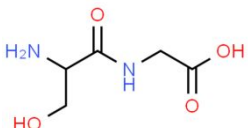  | 162.063 | 163.071 | DDA for preferred ion | [M+H] <sup>+</sup> | <chem>C(C(C(=O)NCC(=O)O)N)O</chem> | InChI=1S/C5H10N2O4/c6-3(2-8)5(11)7-1-4(9)10/h3,8H,1-2,6H2,(H,7,11)(H,9,10) |                                                                                                |
| Pipecolic acid | C6 H11 N O2  |   | 129.078 | 130.086 | DDA for preferred ion | [M+H] <sup>+</sup> | <chem>C1CCNC(C1)C(=O)O</chem>      | InChI=1S/C6H11NO2/c8-6(9)5-3-1-2-4-7-5/h5,7H,1-4H2,(H,8,9)                 |                                                                                                |
| Pyruvic acid   | C3 H4 O3     |   | 88.016  | 87.008  | DDA for preferred ion | [M-H] <sup>-</sup> | <chem>CC(=O)C(=O)O</chem>          | InChI=1S/C3H4O3/c1-2(4)3(5)6/h1H3,(H,5,6)                                  |                                                                                                |
| Lactic acid    | C3 H6 O3     |  | 90.031  | 89.024  | DDA for preferred ion | [M-H] <sup>-</sup> | <chem>CC(C(=O)O)O</chem>           | InChI=1S/C3H6O3/c1-2(4)3(5)6/h2,4H,1H3,(H,5,6)                             |                                                                                                |

|                   |                                                               |                                                                                     |         |         |                       |                      |                                              |                                                                                             |
|-------------------|---------------------------------------------------------------|-------------------------------------------------------------------------------------|---------|---------|-----------------------|----------------------|----------------------------------------------|---------------------------------------------------------------------------------------------|
| Tryptophan        | C <sub>11</sub> H <sub>12</sub> N <sub>2</sub> O <sub>2</sub> | 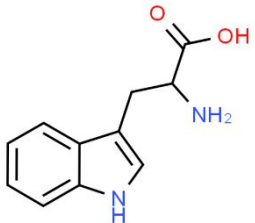   | 204.089 | 205.096 | No MS2                | [M+H] <sup>+</sup> 1 | <chem>c1ccc2c(c1)c(c[nH]2)CC(C(=O)O)N</chem> | InChI=1S/C11H12N2O2/c12-9(11(14)15)5-7-6-13-10-4-2-1-3-8(7)10/h1-4,6,9,13H,5,12H2,(H,14,15) |
| 2-Oxobutyric acid | C <sub>4</sub> H <sub>6</sub> O <sub>3</sub>                  |    | 102.031 | 101.02  | DDA for preferred ion | [M-H] <sup>-</sup> 1 | <chem>CCC(=O)C(=O)O</chem>                   | InChI=1S/C4H6O3/c1-2-3(5)4(6)7/h2H2,1H3,(H,6,7)                                             |
| Spermidine        | C <sub>7</sub> H <sub>19</sub> N <sub>3</sub>                 |    | 145.157 | 146.165 | No MS2                | [M+H] <sup>+</sup> 1 | <chem>C(CCNCCCN)CN</chem>                    | InChI=1S/C7H19N3/c8-4-1-2-6-10-7-3-5-9/h10H,1-9H2                                           |
| Hypotaurine       | C <sub>2</sub> H <sub>7</sub> N O <sub>2</sub> S              |    | 109.019 | 110.026 | DDA for preferred ion | [M+H] <sup>+</sup> 1 | <chem>C(CS(=O)O)N</chem>                     | InChI=1S/C2H7NO2S/c3-1-2-6(4)5/h1-3H2,(H,4,5)                                               |
| Acetic acid       | C <sub>2</sub> H <sub>4</sub> O <sub>2</sub>                  |  | 60.020  | 59.013  | DDA for preferred ion | [M-H] <sup>-</sup> 1 | <chem>CC(=O)O</chem>                         | InChI=1S/C2H4O2/c1-2(3)4/h1H3,(H,3,4)                                                       |

|                         |              |                                                                                     |         |         |                       |          |                                        |                                                                                        |
|-------------------------|--------------|-------------------------------------------------------------------------------------|---------|---------|-----------------------|----------|----------------------------------------|----------------------------------------------------------------------------------------|
| 2,6-Diaminopimelic acid | C7 H14 N2 O4 | 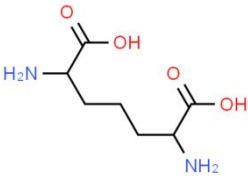   | 190.095 | 189.088 | DDA for preferred ion | [M-H]-1  | <chem>C(CC(C(=O)O)N)CC(C(=O)O)N</chem> | InChI=1S/C7H14N2O4/c8-4(6(10)11)2-1-3-5(9)7(12)13/h4-5H,1-3,8-9H2,(H,10,11)(H,12,13)   |
| Maleic acid             | C4 H4 O4     |    | 116.010 | 115.003 | DDA for preferred ion | [M-H]-1  | <chem>C(=C\C(=O)O)\C(=O)O</chem>       | InChI=1S/C4H4O4/c5-3(6)1-2-4(7)8/h1-2H,(H,5,6)(H,7,8)/b2-1-                            |
| Glyceraldehyde          | C3 H6 O3     |    | 90.031  | 89.024  | DDA for preferred ion | [M-H]-1  | <chem>C(C(C=O)O)O</chem>               | InChI=1S/C3H6O3/c4-1-3(6)2-5/h1,3,5-6H,2H2                                             |
| gamma-Aminobutyric acid | C4 H9 N O2   |    | 103.063 | 104.070 | No MS2                | [M+H]+1  | <chem>C(CC(=O)O)CN</chem>              | InChI=1S/C4H9NO2/c5-3-1-2-4(6)7/h1-3,5H2,(H,6,7)                                       |
| Glycerol 3-phosphate    | C3 H9 O6 P   |   | 172.013 | 195.002 | DDA for preferred ion | [M+Na]+1 | <chem>C(C(COP(=O)(O)O)O)O</chem>       | InChI=1S/C3H9O6P/c4-1-3(5)2-9-10(6,7)8/h3-5H,1-2H2,(H2,6,7,8)                          |
| Dihydroxyphenyl alanine | C9 H11 N O4  |  | 179.068 | 198.075 | DDA for preferred ion | [M+H]+1  | <chem>c1cc(c(cc1CC(C(=O)O)N)O)O</chem> | InChI=1S/C9H11NO4/c10-6(9(13)14)3-5-1-2-7(11)8(12)4-5/h1-2,4,6,11-12H,3,10H2,(H,13,14) |



## References

- (1) Kawano, Y.; Edwards, M.; Huang, Y.; Bilate, A. M.; Araujo, L. P.; Tanoue, T.; Atarashi, K.; Ladinsky, M. S.; Reiner, S. L.; Wang, H. H.; Mucida, D.; Honda, K.; Ivanov, I. I. Microbiota Imbalance Induced by Dietary Sugar Disrupts Immune-Mediated Protection from Metabolic Syndrome. *Cell* **2022**, *185* (19), 3501-3519.e20. <https://doi.org/10.1016/j.cell.2022.08.005>.
- (2) Yin, Y.; Cai, J.; Zhou, L.; Xing, L.; Zhang, W. Dietary Oxidized Beef Protein Alters Gut Microbiota and Induces Colonic Inflammatory Damage in C57BL/6 Mice. *Front. Nutr.* **2022**, *9* (3). <https://doi.org/10.3389/fnut.2022.980204>.
- (3) Oliphant, K.; Allen-Vercoe, E. Macronutrient Metabolism by the Human Gut Microbiome: Major Fermentation by-Products and Their Impact on Host Health. *Microbiome* **2019**, *7* (1), 1–15. <https://doi.org/10.1186/s40168-019-0704-8>.
- (4) Beisner, J.; Gonzalez-granda, A.; Basrai, M.; Damms-machado, A. Fructose-Induced Intestinal Microbiota Shift. *Nutrients* **2020**, *12*, 1–21.
- (5) Snelson, M.; Coughlan, M. T. Dietary Advanced Glycation End Products: Digestion, Metabolism and Modulation of Gut Microbial Ecology. *Nutrients* **2019**, *11* (2). <https://doi.org/10.3390/nu11020215>.
